# Supplementary material for: Transcript profiling of different types of multiple sclerosis lesions yields FGF1 as a promoter of remyelination
Source: PubMed Central journal article supplement (PMC4359505; doi:10.1186/s40478-014-0168-9), 2014-12-11
Supplement: 40478_2014_168_MOESM1_ESM.pdf [file 40478_2014_168_MOESM1_ESM.pdf]

**Supplementary Table 1:** Frozen tissue samples used for qPCR and immunofluorescence

| patients and controls | blocks | lesion type and control   | age (Y) | sex | disease duration (Y) | MS classification |
|-----------------------|--------|---------------------------|---------|-----|----------------------|-------------------|
| MS1                   | 1      | active                    | 52      | F   | 11                   | SPMS              |
| MS2                   | 2      | inactive and remyelinated | 50      | F   | 17                   | SPMS              |
| MS3                   | 1      | active                    | 48      | F   | 8                    | SPMS              |
| MS4                   | 1      | inactive                  | 65      | M   | 25                   | SPMS              |
| MS5                   | 2      | active                    | 53      | F   | 16                   | SPMS              |
| MS6                   | 3      | remyelinated              | 59      | M   | 32                   | SPMS              |
| MS7                   | 1      | active                    | 53      | F   | 22                   | SPMS              |
| MS8                   | 2      | active and remyelinated   | 66      | M   | --                   | --                |
| MS9                   | 1      | remyelinated              | 70      | F   | 40                   | PPMS              |
| MS10                  | 3      | inactive and remyelinated | 77      | F   | 50                   | RRMS              |
| MS11                  | 1      | inactive                  | 42      | M   | 6                    | PPMS              |
| MS12                  | 1      | remyelinated              | 81      | F   | 41                   | SPMS              |
| MS13                  | 1      | remyelinated              | 47      | F   | 24                   | SPMS              |
| MS14                  | 1      | remyelinated              | 54      | F   | --                   | --                |
| MS15                  | 1      | remyelinated              | 62      | M   | --                   | --                |
| C1                    | 1      | control                   | 47      | F   |                      |                   |
| C2                    | 3      | control                   | 46      | F   |                      |                   |
| C3                    | 3      | control                   | 49      | M   |                      |                   |
| C4                    | 3      | control                   | 48      | M   |                      |                   |
| C5                    | 1      | control                   | 18      | M   |                      |                   |
| C6                    | 1      | control                   | 16      | M   |                      |                   |
| C7                    | 1      | control                   | 66      | F   |                      |                   |

F: female; M: male; PPMS: primary progressive multiple sclerosis; RRMS: relapsing remitting multiple sclerosis; SPMS: secondary progressive multiple sclerosis; Y: years; -- disease duration and MS classification not exactly known.
