# Supplementary material for: Transcript profiling of different types of multiple sclerosis lesions yields FGF1 as a promoter of remyelination
Source: PubMed Central journal article supplement (PMC4359505; doi:10.1186/s40478-014-0168-9), 2014-12-11
Supplement: 40478_2014_168_MOESM2_ESM.pdf [file 40478_2014_168_MOESM2_ESM.pdf]

## Supplementary Figure 1

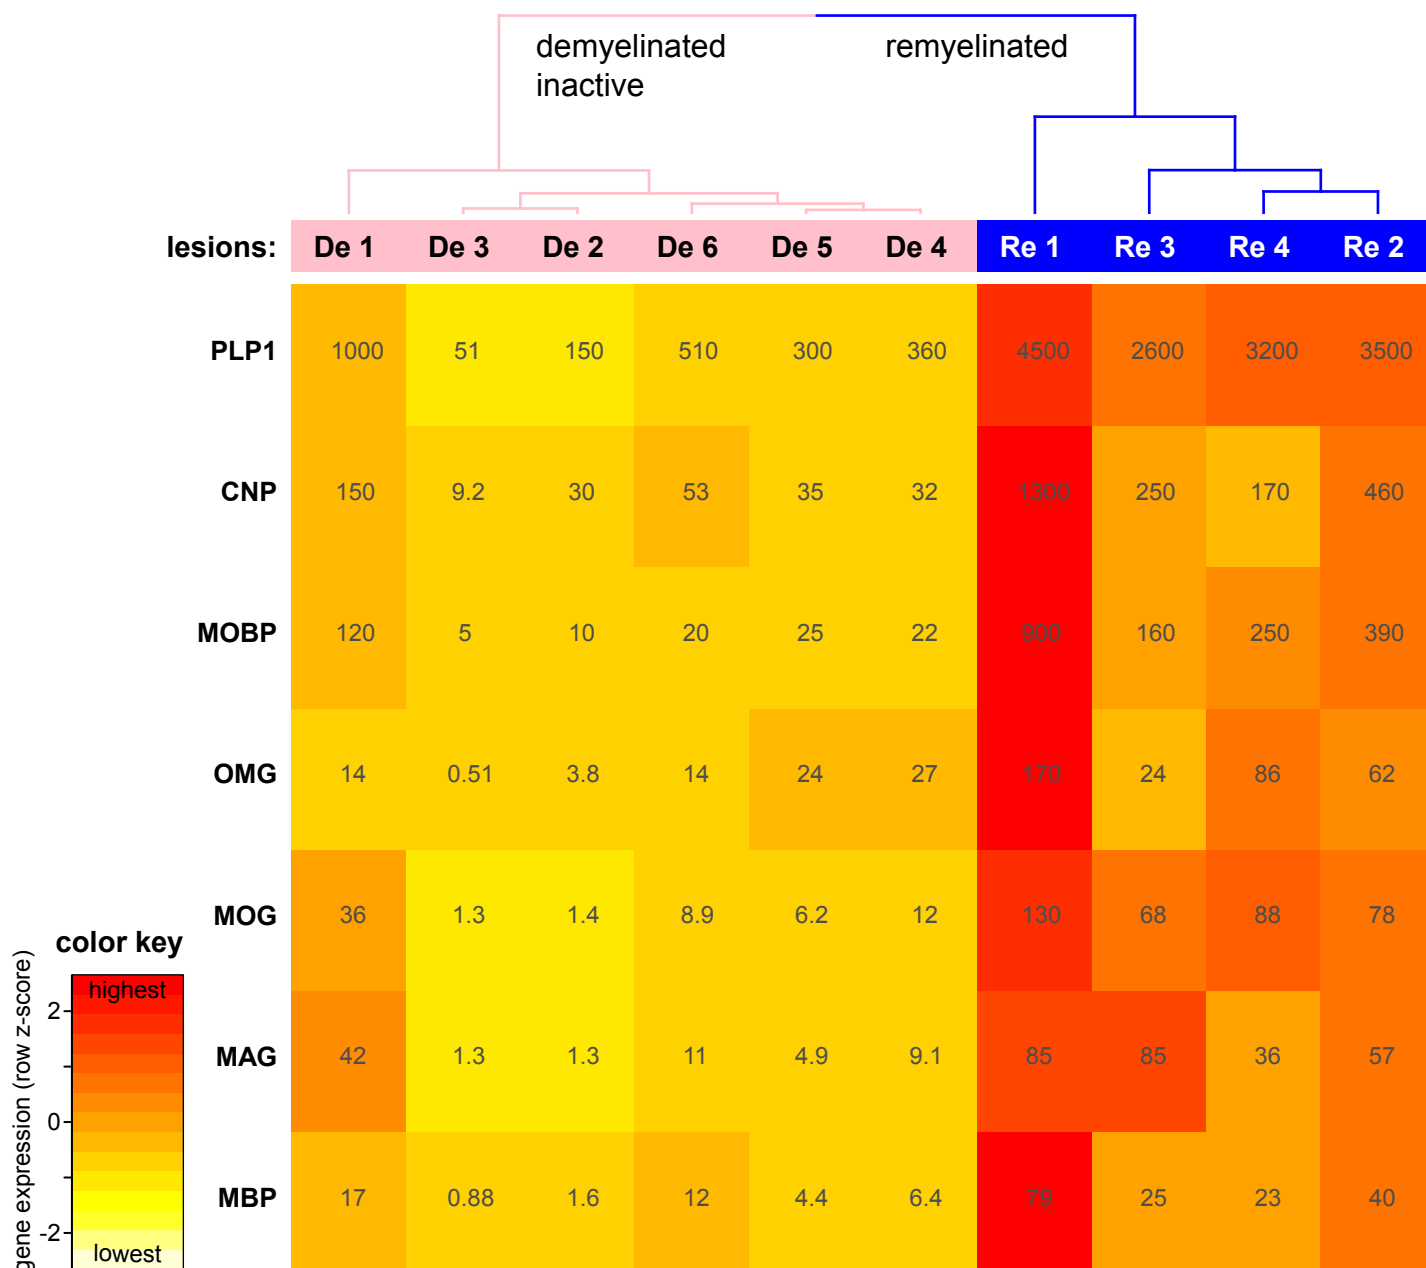

**Suppl. Figure 1: Unsupervised clustering reflects histological discrimination between remyelinated (blue) and demyelinated inactive (pink) lesion areas.** Gene expression of myelin proteins was analyzed by quantitative PCR on low density TaqMan arrays. These values were normalized to the housekeeping gene *GAPDH* (values in % *GAPDH* displayed within heatmap) and then color-coded as z-scores along rows (i.e. separately for each gene, all sample values were centered to mean=0 and scaled to SD=1; the yellows are the samples with the lowest and the reds the samples with the highest gene expression), in order to visualize expression of genes with high (*PLP1*) and low (*MAG*, *MOG*, *MBP*, *OMG*) expression within the same figure. Unsupervised hierarchical clustering was performed using R [1] version 3.0.1, function `heatmap.2` in package `gplots` [2], with clustering function `hclust(d, method="complete")` and distance matrix calculation by `dist(x, method="euclidean")`. Re: remyelinated lesions (blue); De: demyelinated inactive lesions (pink).

### Supplementary references

1. R Core Team (2013). R: A language and environment for statistical computing. R Foundation for Statistical Computing, Vienna, Austria. URL: <http://www.R-project.org/>.
2. Gregory R. Warnes, Ben Bolker, Lodewijk Bonebakker, Robert Gentleman, Wolfgang Huber Andy Liaw, Thomas Lumley, Martin Maechler, Arni Magnusson, Steffen Moeller, Marc Schwartz and Bill Venables (2014). `gplots`: Various R programming tools for plotting data. R package version 2.14.1. URL: <http://CRAN.R-project.org/package=gplots>
